# Supplementary material
Source: PubMed Central journal article supplement (PMC2705710)

**Dihydroorotase 3-  
like**

**Urease-like**

**2-Pyrone-4,6-  
dicarboxylate  
lactonase-like**

**NagA/AgaA-like**

**PHP-like**

**Uronate  
isomerase-like**

**Membrane  
dipeptidase-  
like**

**Cytoscape clustering for the amidohydrolase superfamily.**

- Subgroup clusters are marked for four subgroups.
- ◆ Structures determined prior to the start of the ENSPEC/NYSGXRC project in June 2005.
  - ▲ Superfamily members in the target list
  - Five divergent structures determined by ENSPEC/NYSGXRC.
  - All other structures determined by ENSPEC/NYSGXRC .

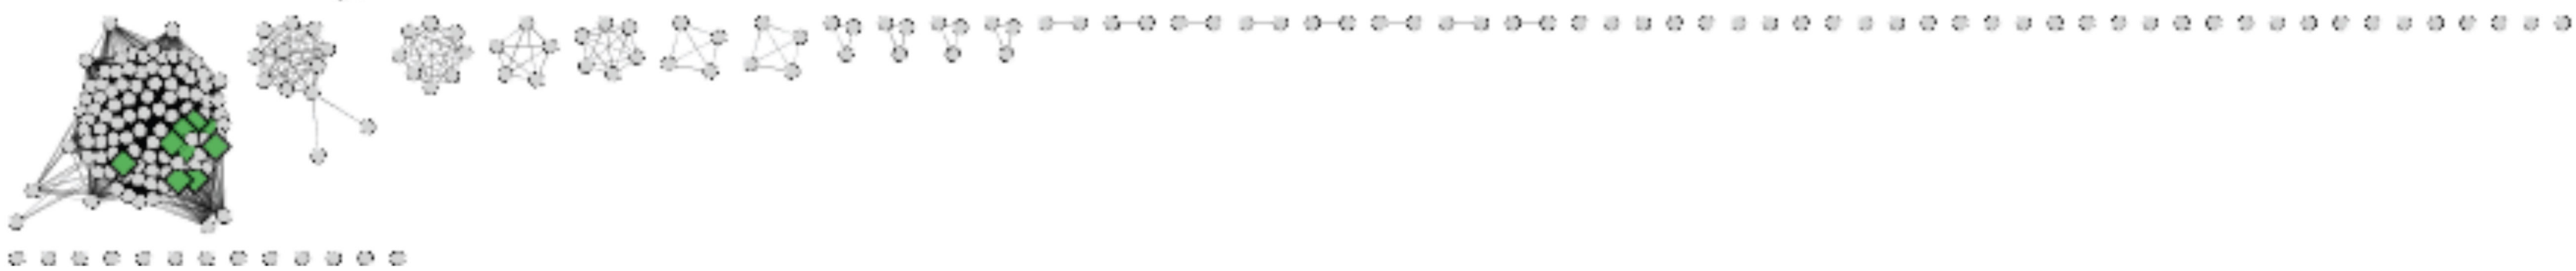



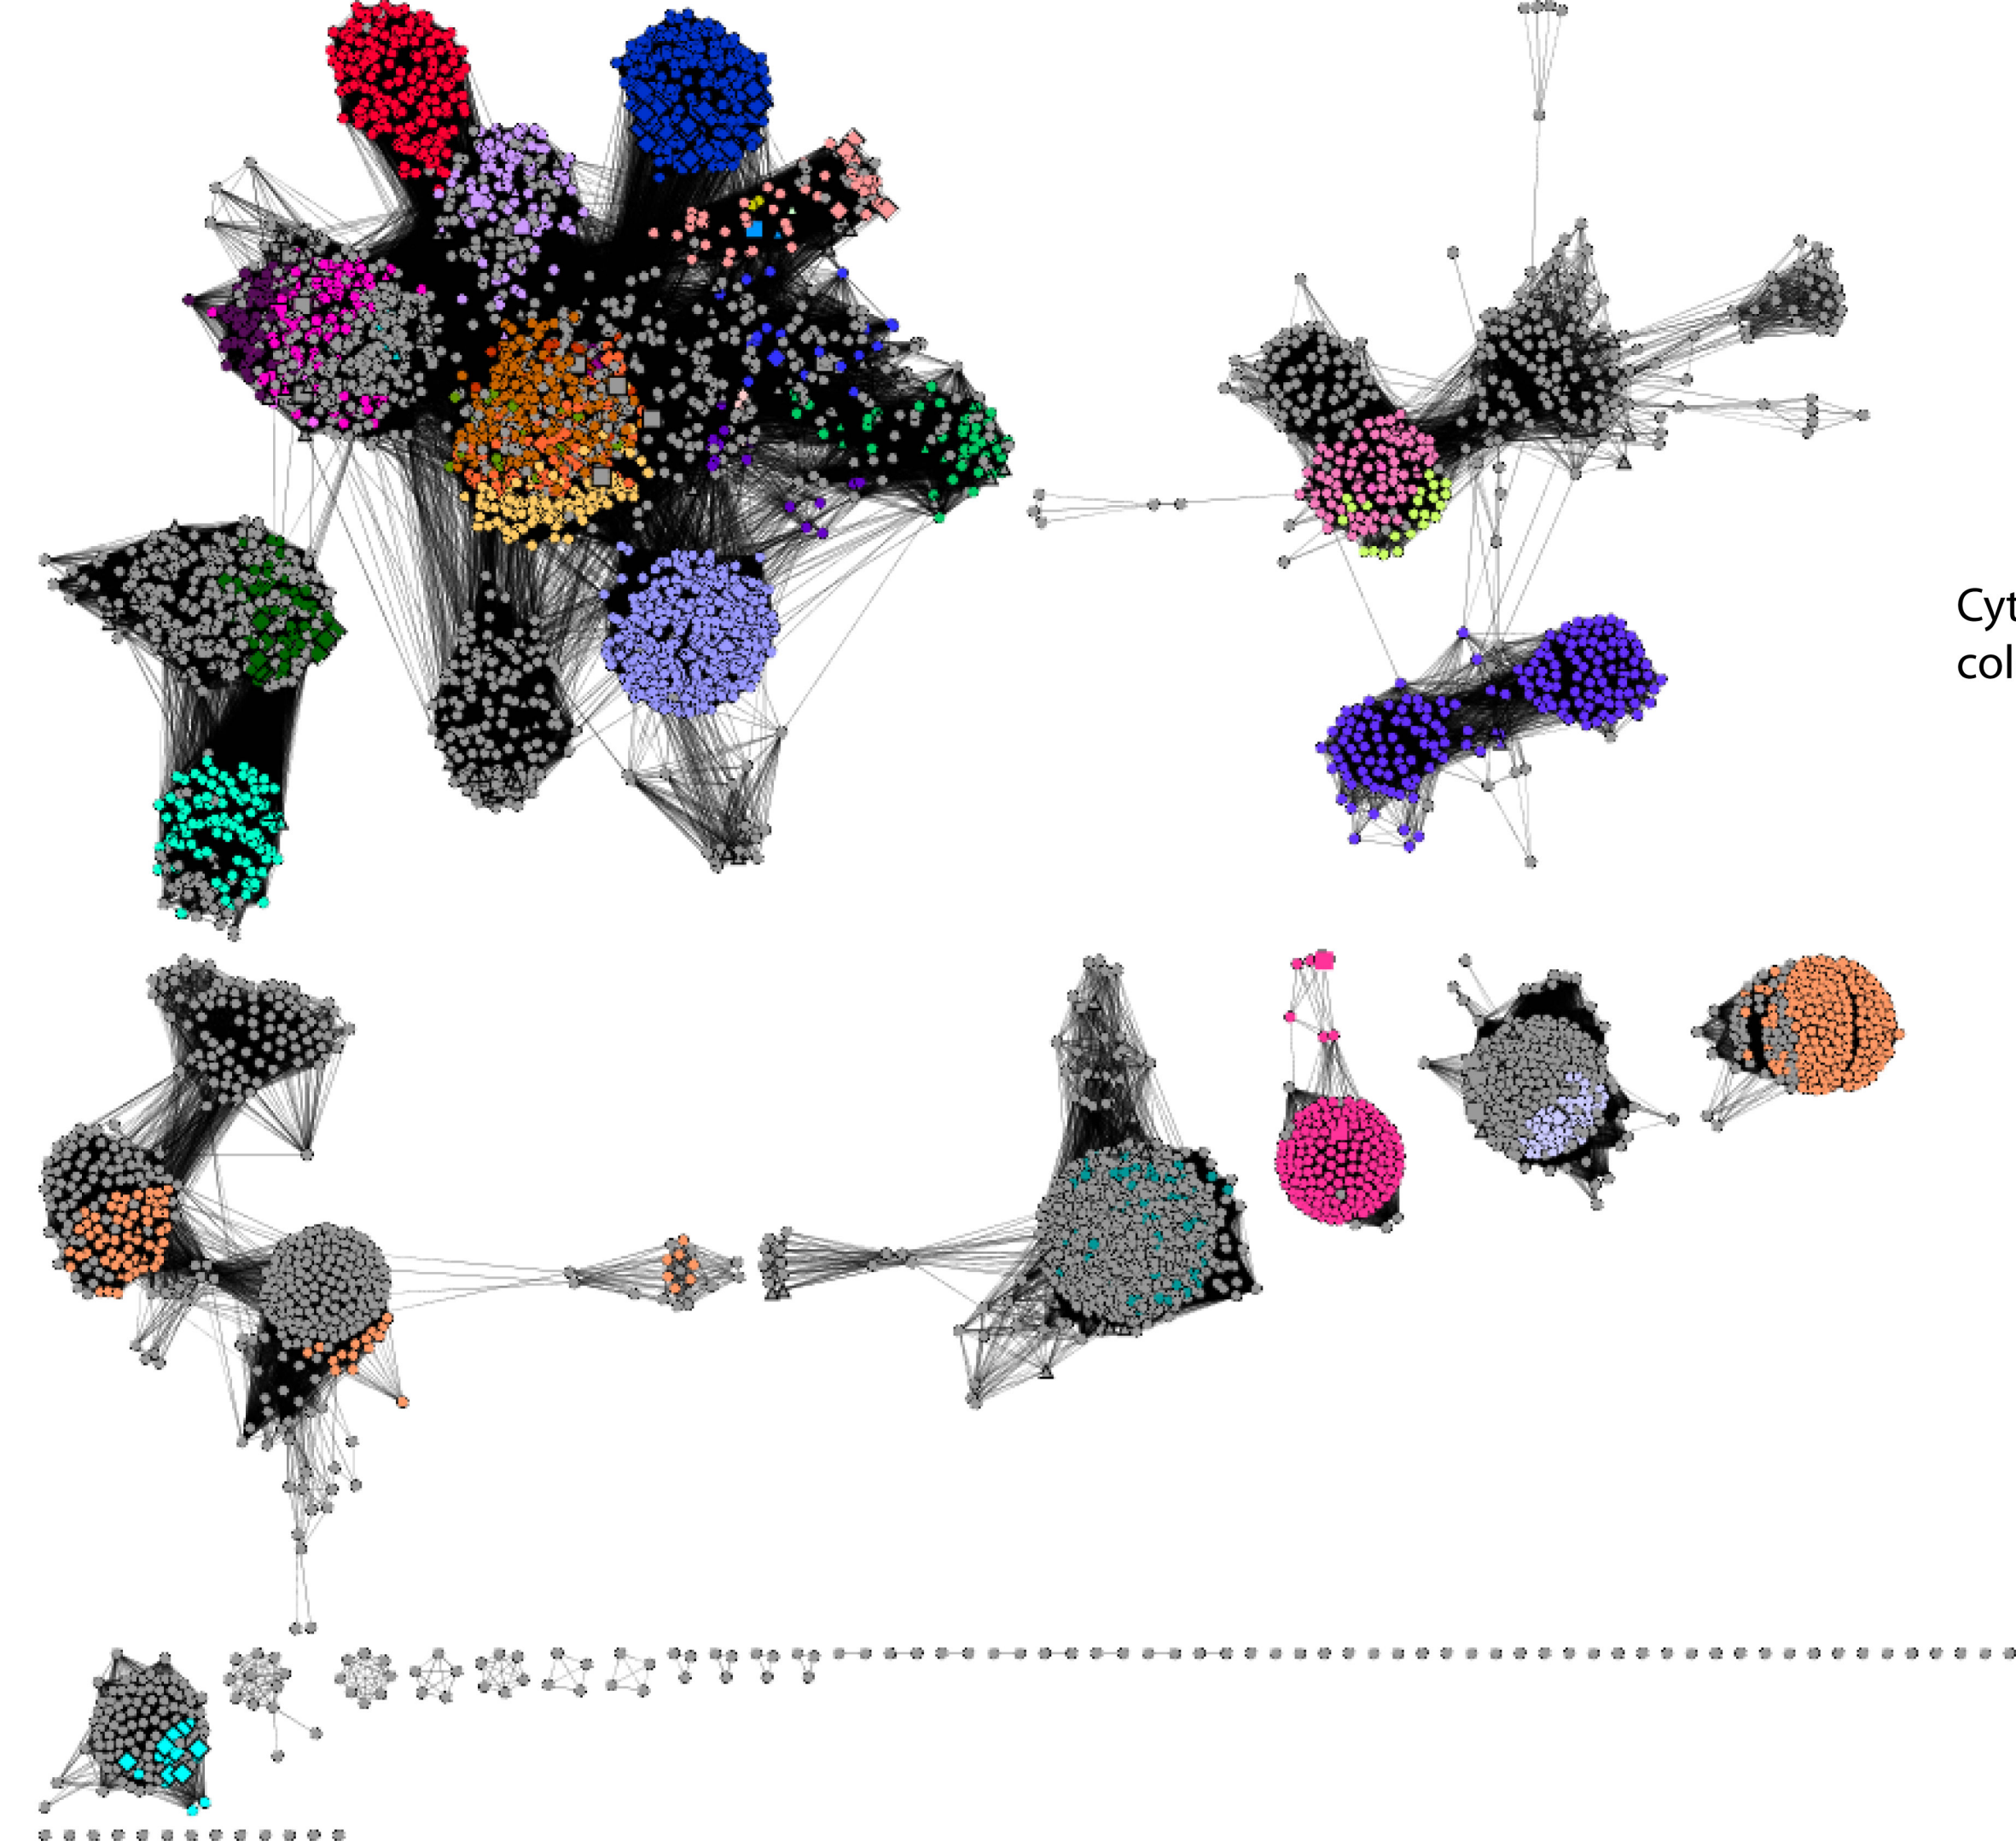

Cytoscape network for the amidohydrolase superfamily colored by subgroup

- 1-aminocyclopropane-1-carboxylate deaminase like
- adenine deaminase like
- adenosine deaminase like
- allantoinase like
- ammelide aminohydrolase like
- AMP deaminase like
- aryldialkylphosphatase like
- AtzA/TriA/TrzA like
- collapsin response mediator protein / dihydroorotase-like protein / dihydropyrimidase-like protein
- cytosine deaminase like
- d-hydantoinase like
- dihydroorotase1 like
- dihydroorotase2 like
- dihydroorotase3 like
- glucuronate isomerase like
- guanine deaminase like
- hydroxydechloroatrazine ethylaminohydrolase like
- imidazolonepropionase like
- isoaspartyl dipeptidase like
- l-hydantoinase like
- membrane dipeptidase like
- n-acetylglucosamine-6-phosphate deacetylase / n-acetylgalactosamine-6-phosphate deacetylase like
- n-acyl-d-amino-acid deacylase like
- phosphotriesterase like
- TrzN like
- urease like
- n-isopropylammelide isopropylaminohydrolase like
- TatD\_MttC
- polymerase histidinol phosphatase like
- nonoxidative decarboxylase like
- 2-pyrone-4,6-dicarboxylate lactonase like
- 4-OMA hydratase / HDDVAMCC hydrolase like
- formimidoylglutamate deiminase like



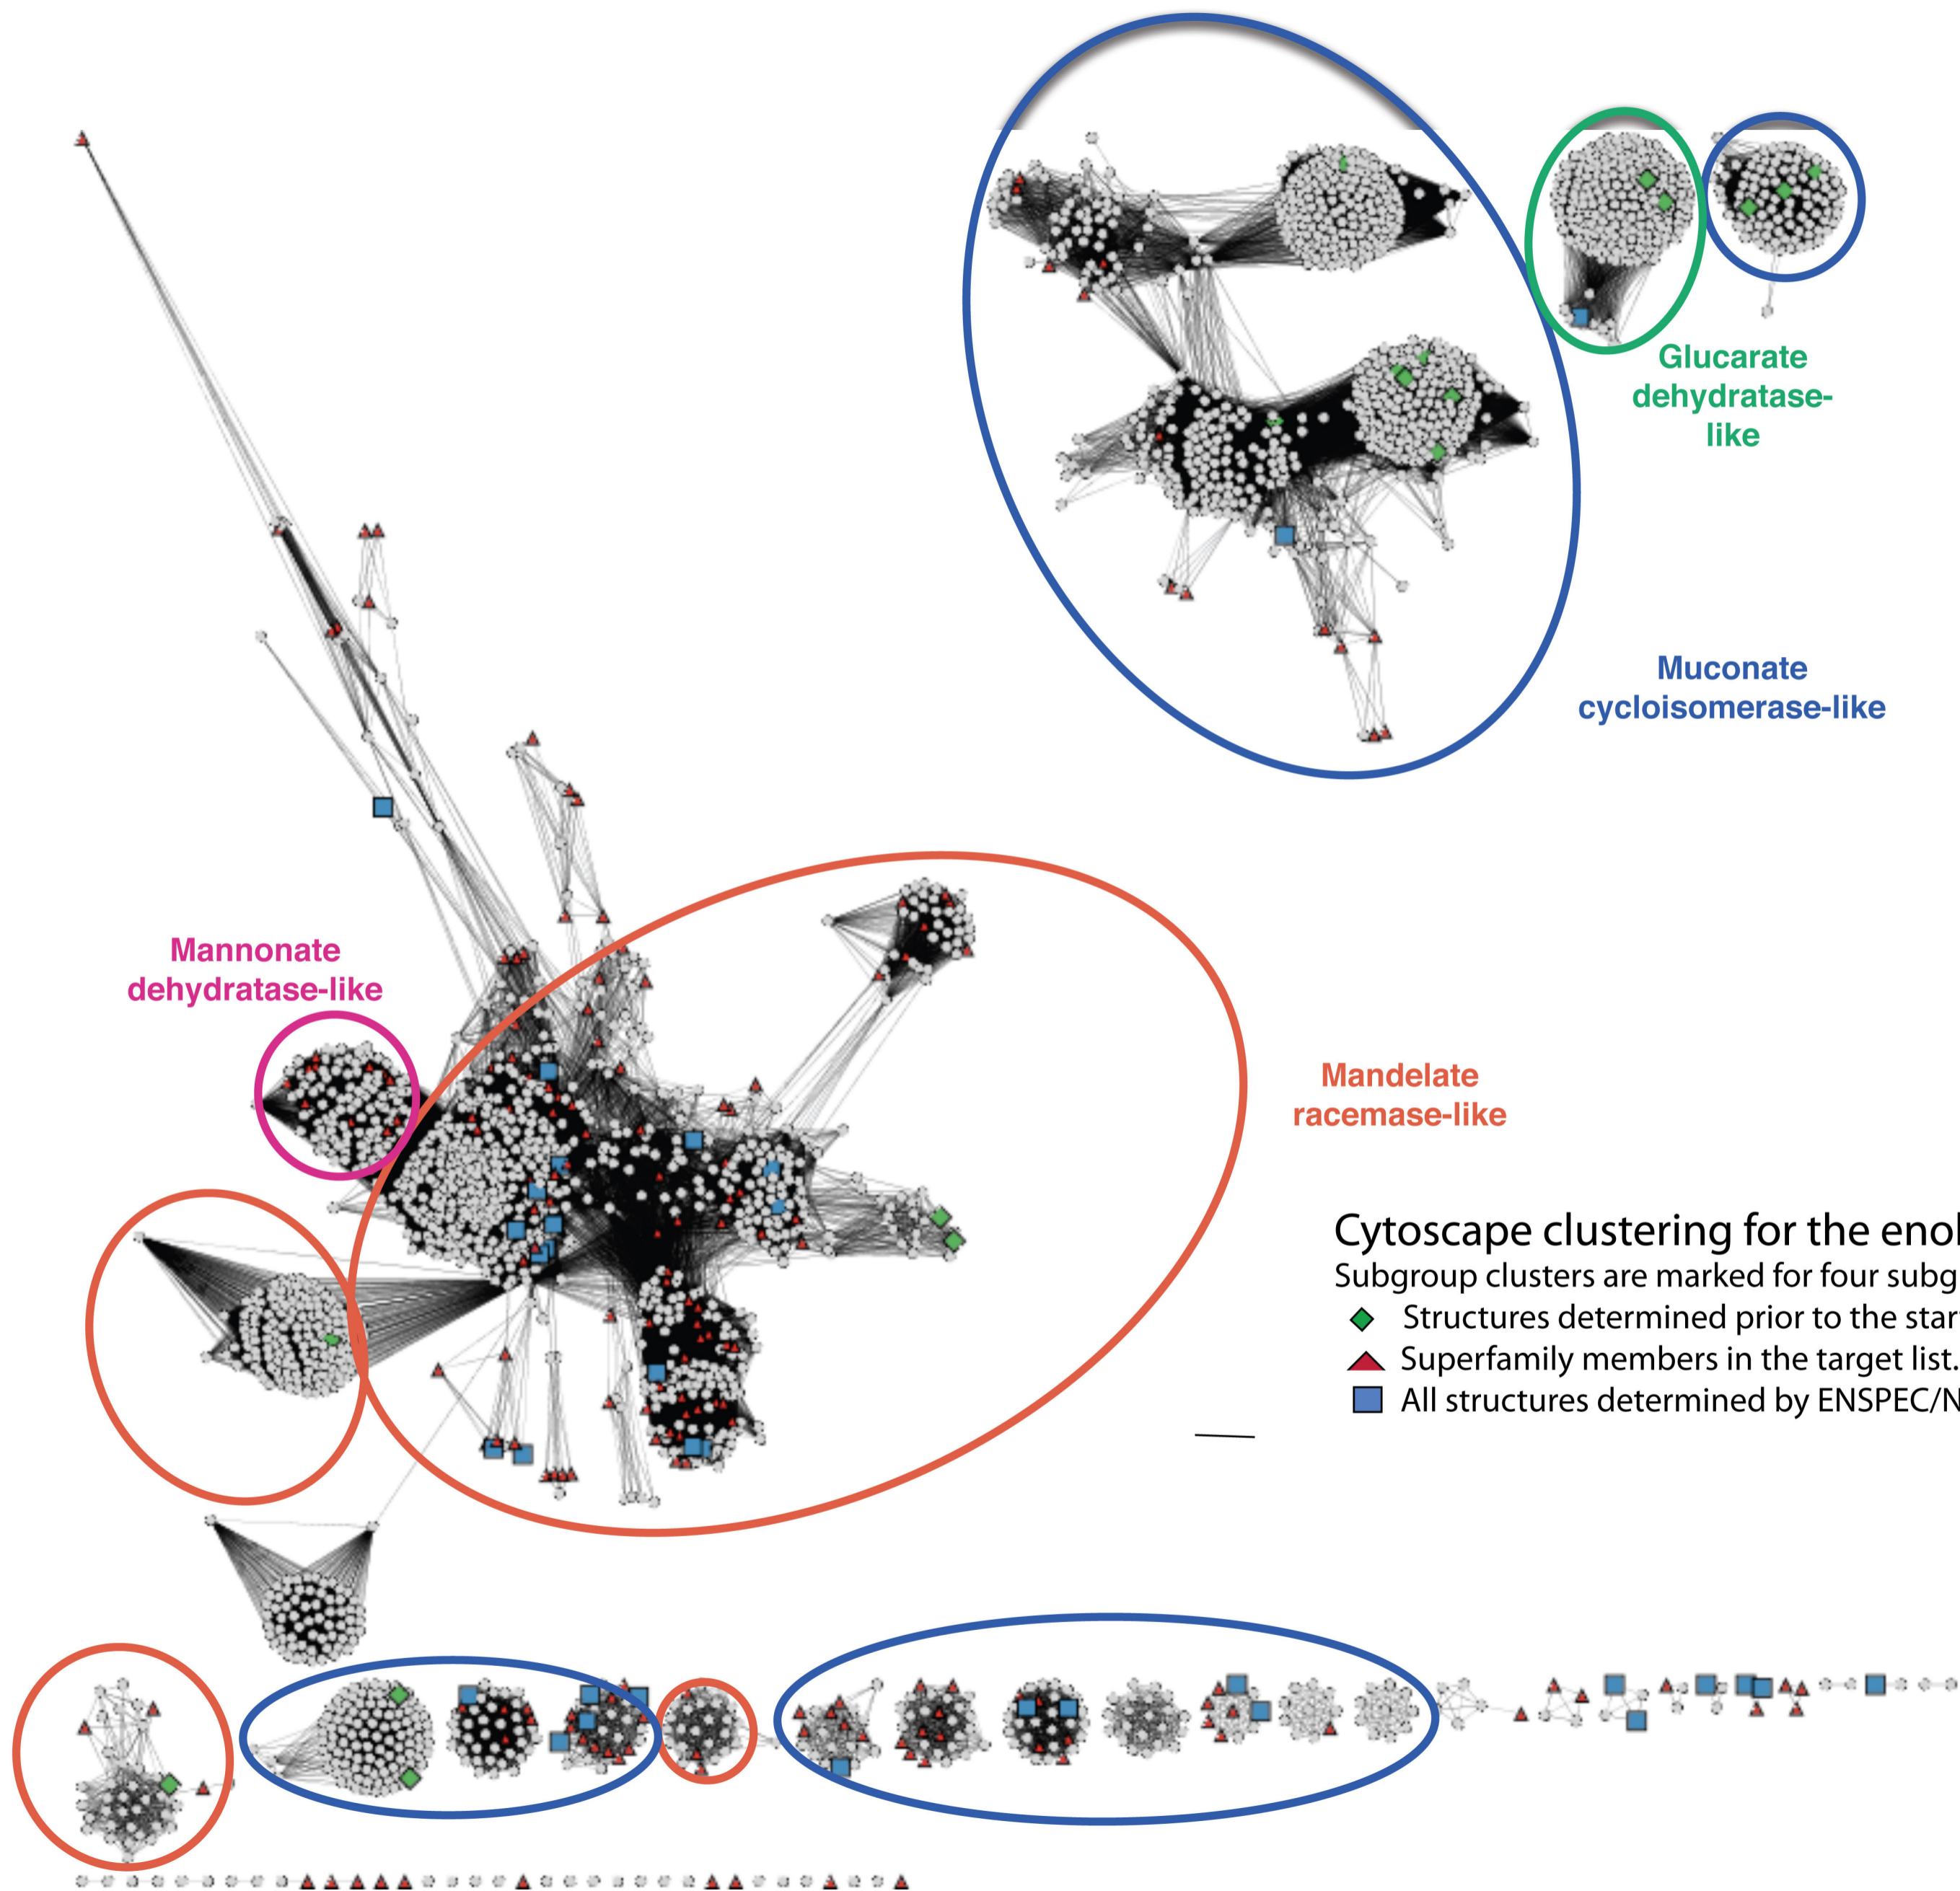

Glucarate dehydratase-like

Muconate cycloisomerase-like

Mannonate dehydratase-like

Mandelate racemase-like

**Cytoscape clustering for the enolase superfamily.**

Subgroup clusters are marked for four subgroups.

- ◆ Structures determined prior to the start of the ENSPEC/NYSGXRC project in June 2005.
- ▲ Superfamily members in the target list.
- All structures determined by ENSPEC/NYSGXRC.

—

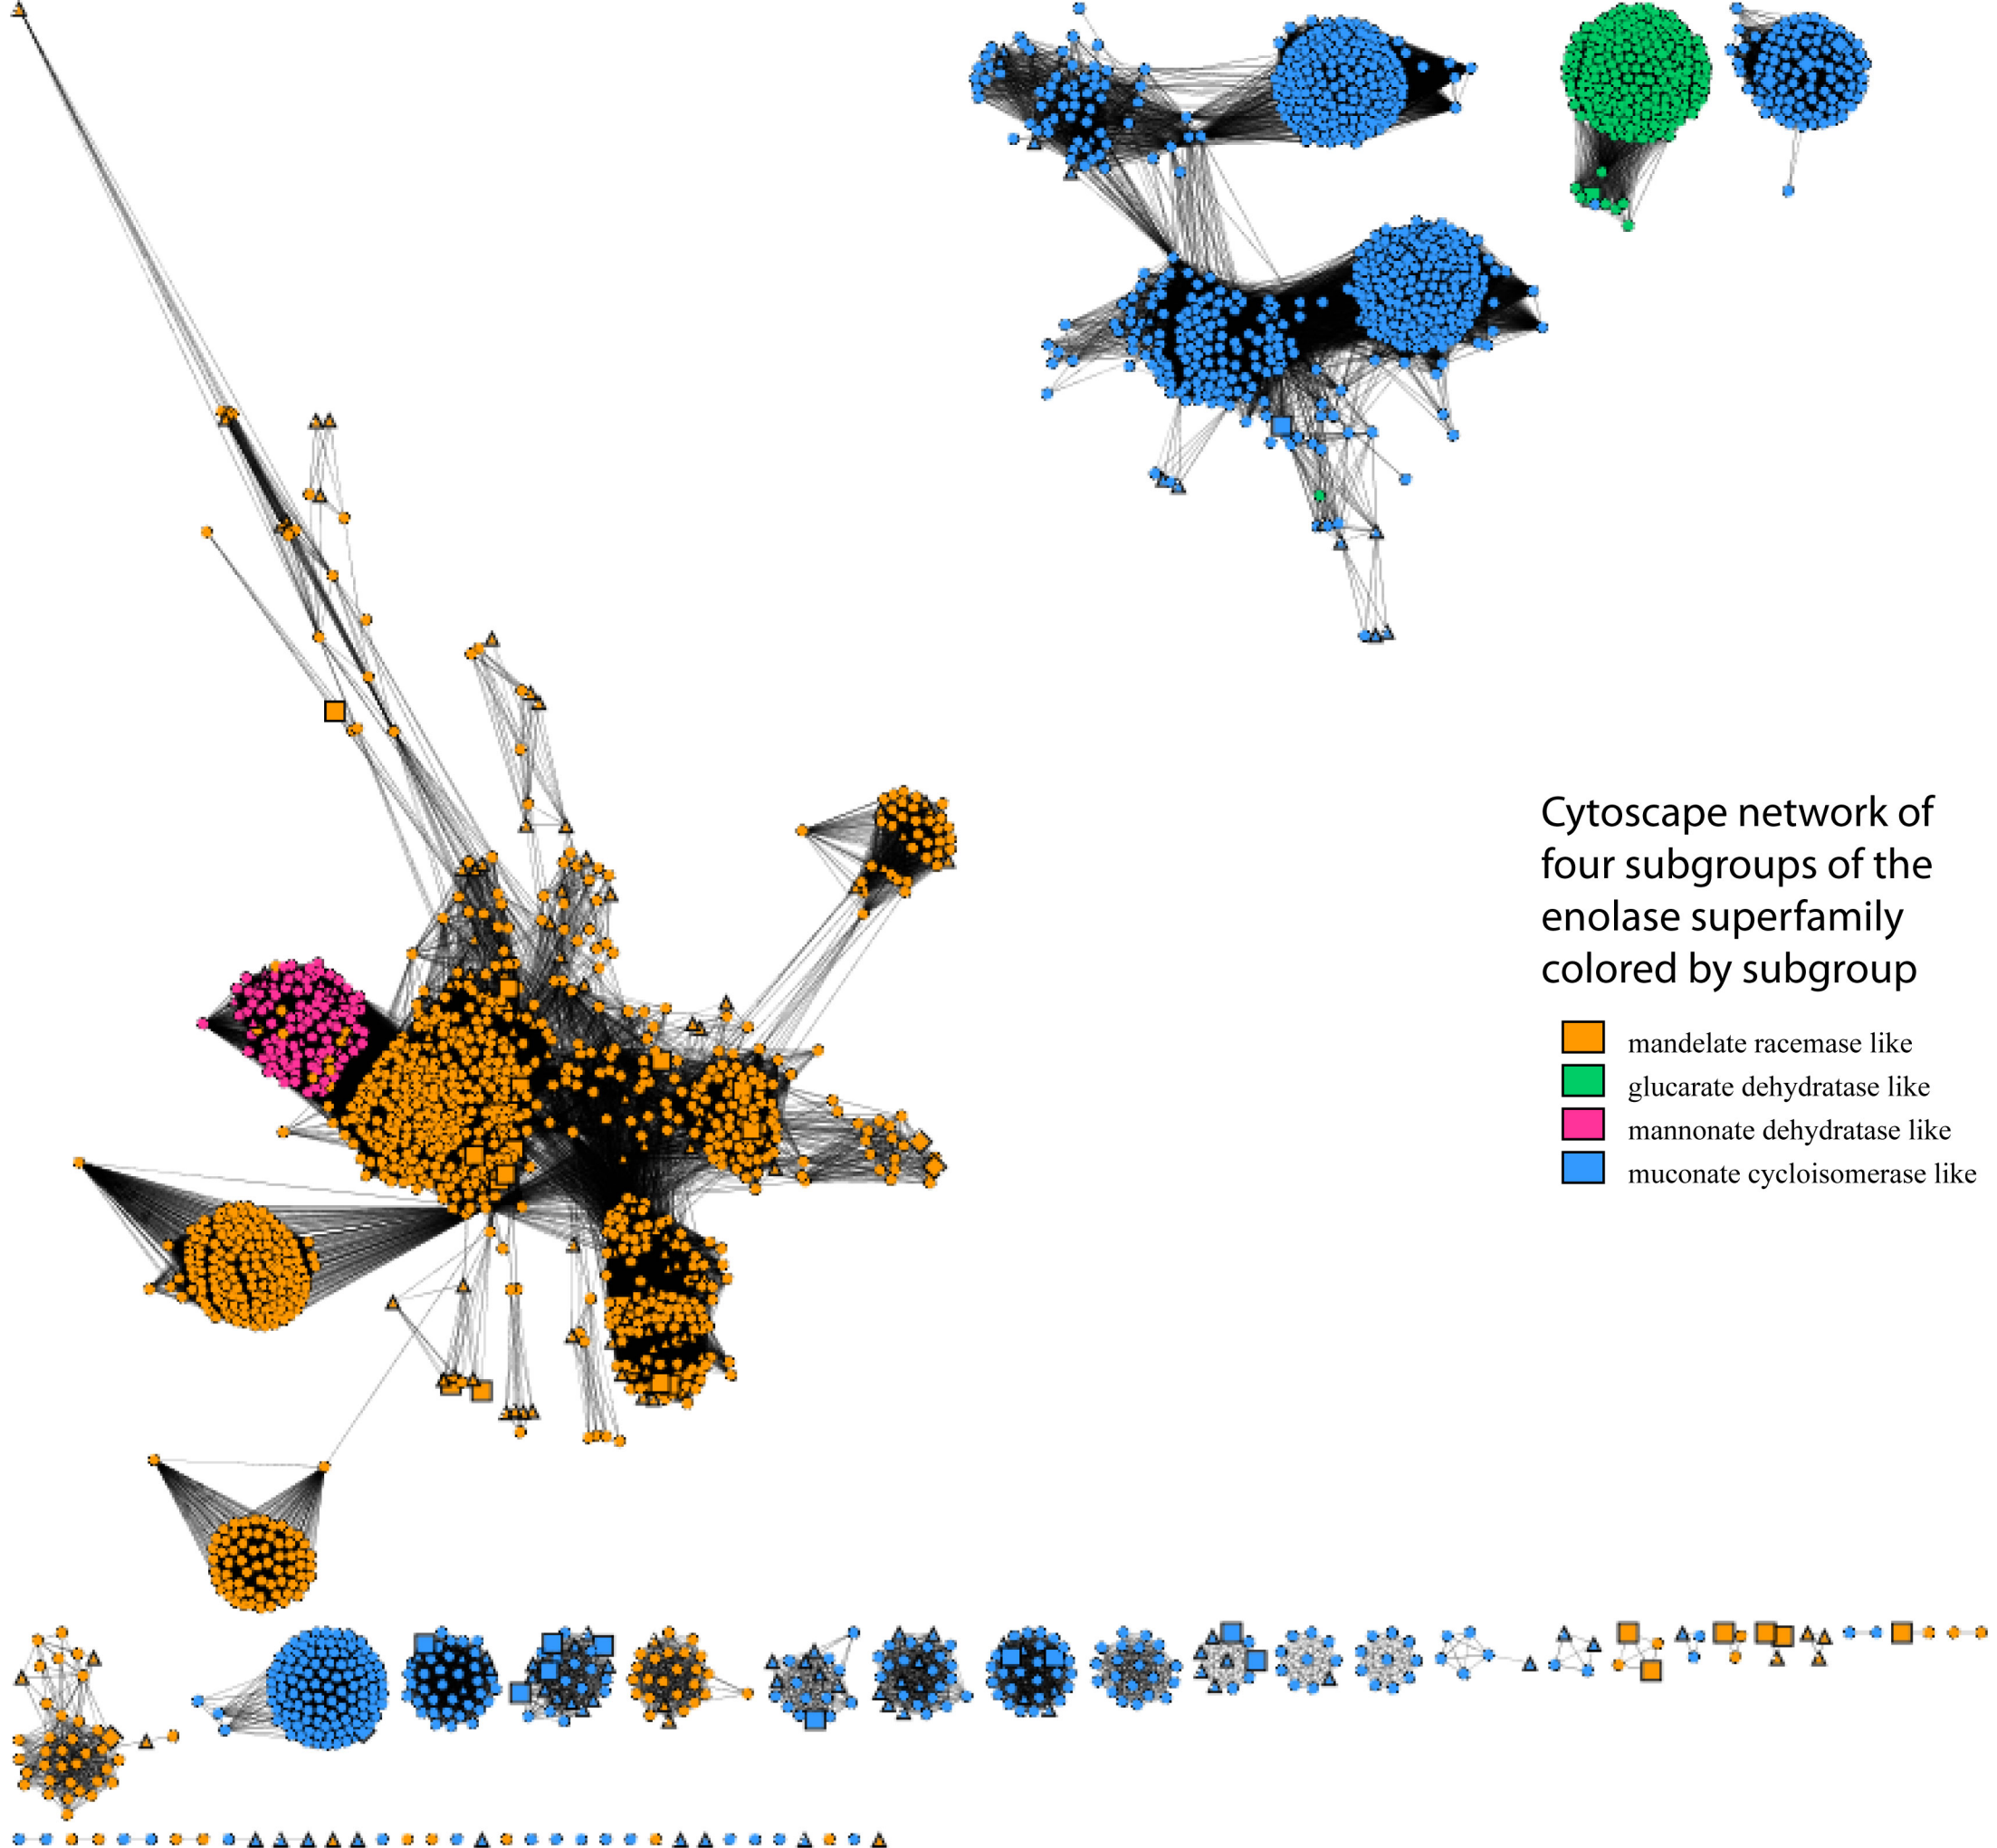



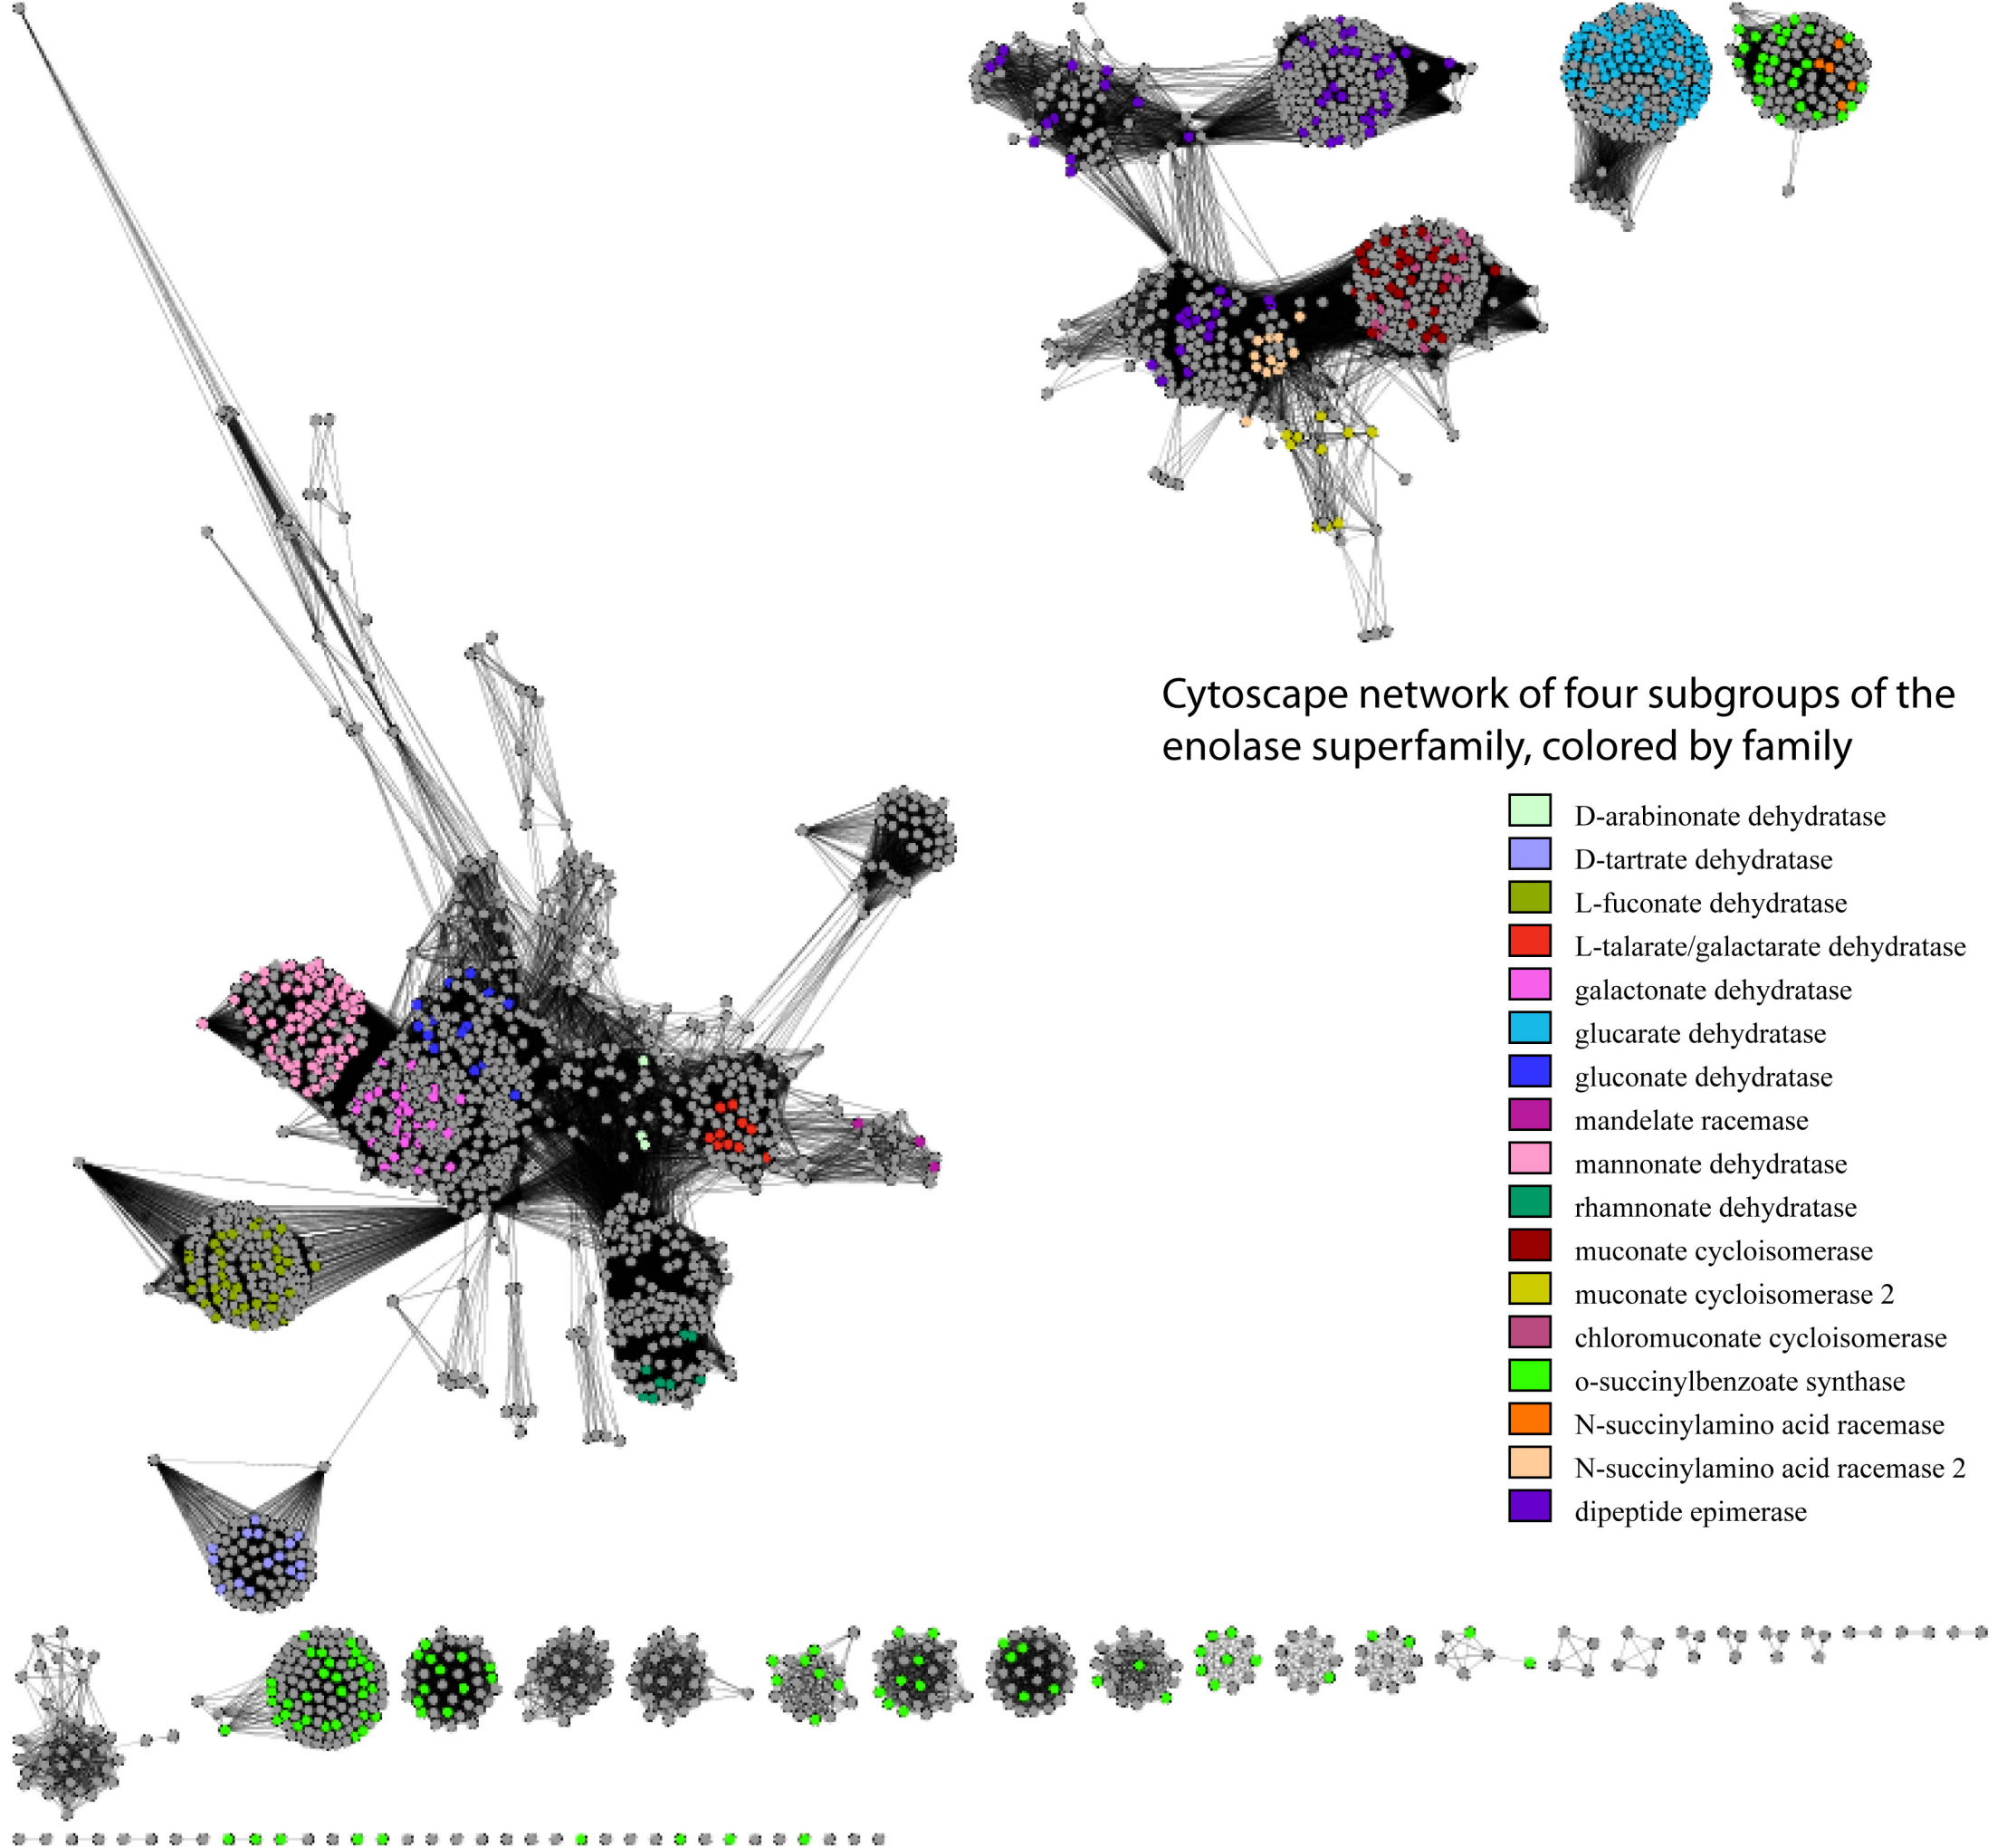

Supplement: 10969_2008_9056_MOESM1_ESM.pdf [file 10969_2008_9056_MOESM1_ESM.pdf]
